# Supplementary material for: The combined effect of commercial tilapia collagen peptides and antioxidants against UV-induced skin photoaging in mice
Source: Royal Society of Chemistry journal article supplement (doi:10.1039/d3fo01516e), 2023-01-01
Supplement: d3fo01516e4.pdf [file d3fo01516e4.pdf]

## Supporting materials

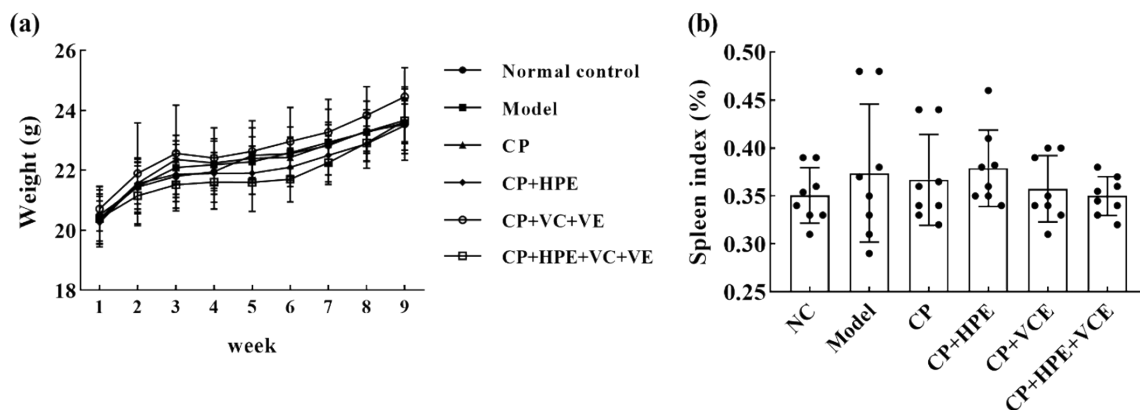

**Fig 1.** The weight changes and spleen index of mice among different treatment groups.
