# Supplementary figures and images for: The combined effect of commercial tilapia collagen peptides and antioxidants against UV-induced skin photoaging in mice
Source: Royal Society of Chemistry journal article supplement (doi:10.1039/d3fo01516e), 2023-01-01

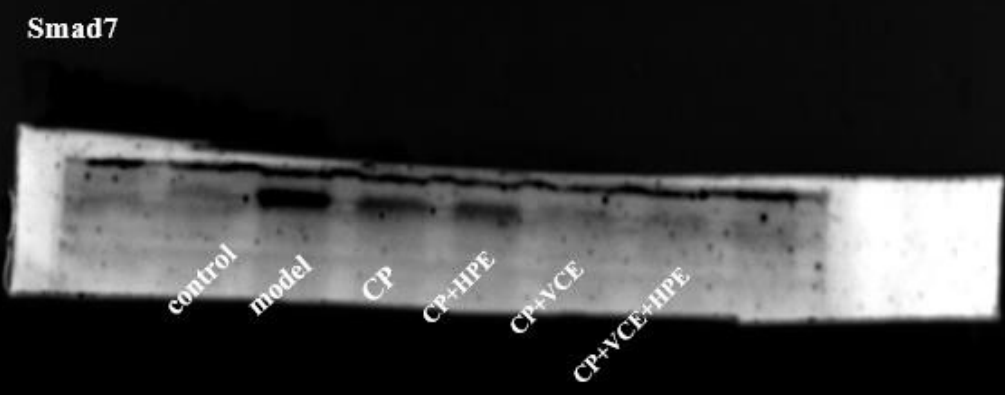

Supplement: d3fo01516e1.pdf [file d3fo01516e1.pdf]

TGF- $\beta$

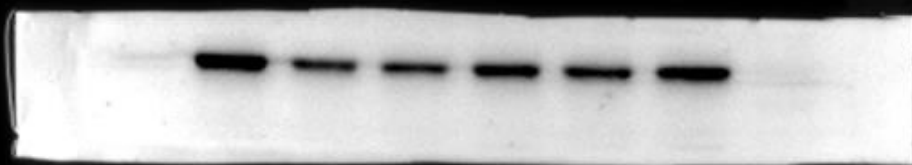

control

model

CP

CP+HPE

CP+VCE

CP+VCE+HPE

Supplement: d3fo01516e2.pdf [file d3fo01516e2.pdf]

$\beta$ -actin

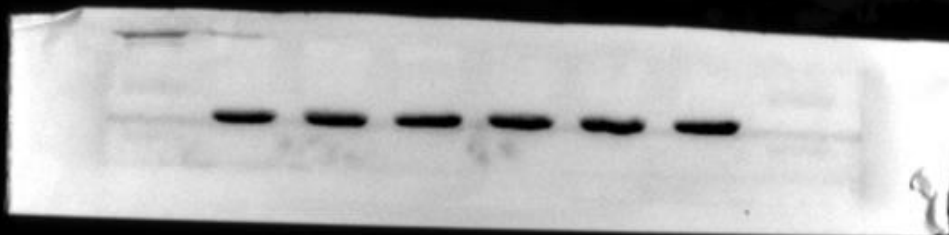

control

model

CP

CP+HPE

CP+VCE

CP+VCE+HPE

Supplement: d3fo01516e3.pdf [file d3fo01516e3.pdf]
